# Supplementary material for: Increased incidence of traffic accidents in Toxoplasma-infected military drivers and protective effect RhD molecule revealed by a large-scale prospective cohort study
Source: Springer Nature journal article supplement (doi:10.1186/1471-2334-9-72), 2009-05-26
Supplement: 12879_2008_837_MOESM1_ESM.doc [file 12879_2008_837_MOESM1_ESM.doc]

243/65

265/66

137/32

45/13

2460/540

13/4

5/0

1/1
